# Supplementary material for: Regulation and function of H3K36 di-methylation by the trithorax-group protein complex AMC
Source: PubMed Central journal article supplement (PMC5963871; doi:10.1242/dev.163808), 2018-04-05
Supplement: develop-145-163808-s1.pdf [file develop-145-163808-s1.pdf]

## SUPPLEMENTAL FIGURES

## Figure S1

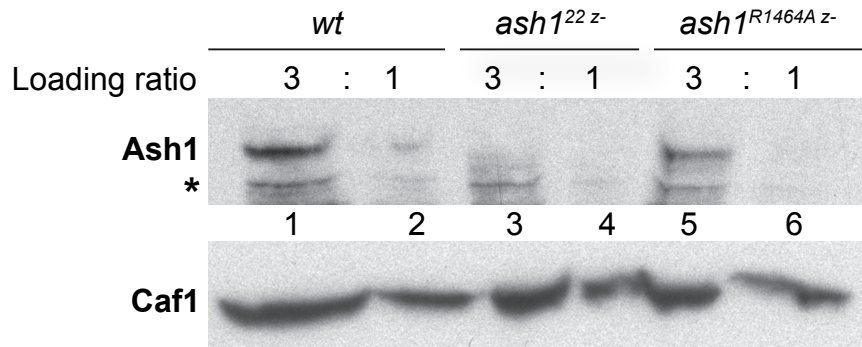

## Figure S1

*ash1<sup>22</sup>* mutants lack Ash1 protein and the Ash1<sup>R1464A</sup> protein is expressed at levels similar to wild-type Ash1. Western Blot on total cell extracts from brains and imaginal discs of *wildtype* (*wt*), *ash1<sup>22 z-</sup>* or *ash1<sup>R1464A z-</sup>* 3<sup>rd</sup> instar larvae, probed with antibodies against Ash1 and, as loading control, Caf1. No Ash1 protein is detected in *ash1<sup>22 z-</sup>* mutant larvae, Ash1<sup>R1464A</sup> protein levels are similar to that of Ash1 in *wt* larvae. Asterisk marks an unspecific cross-reacting band that serves as additional loading control.

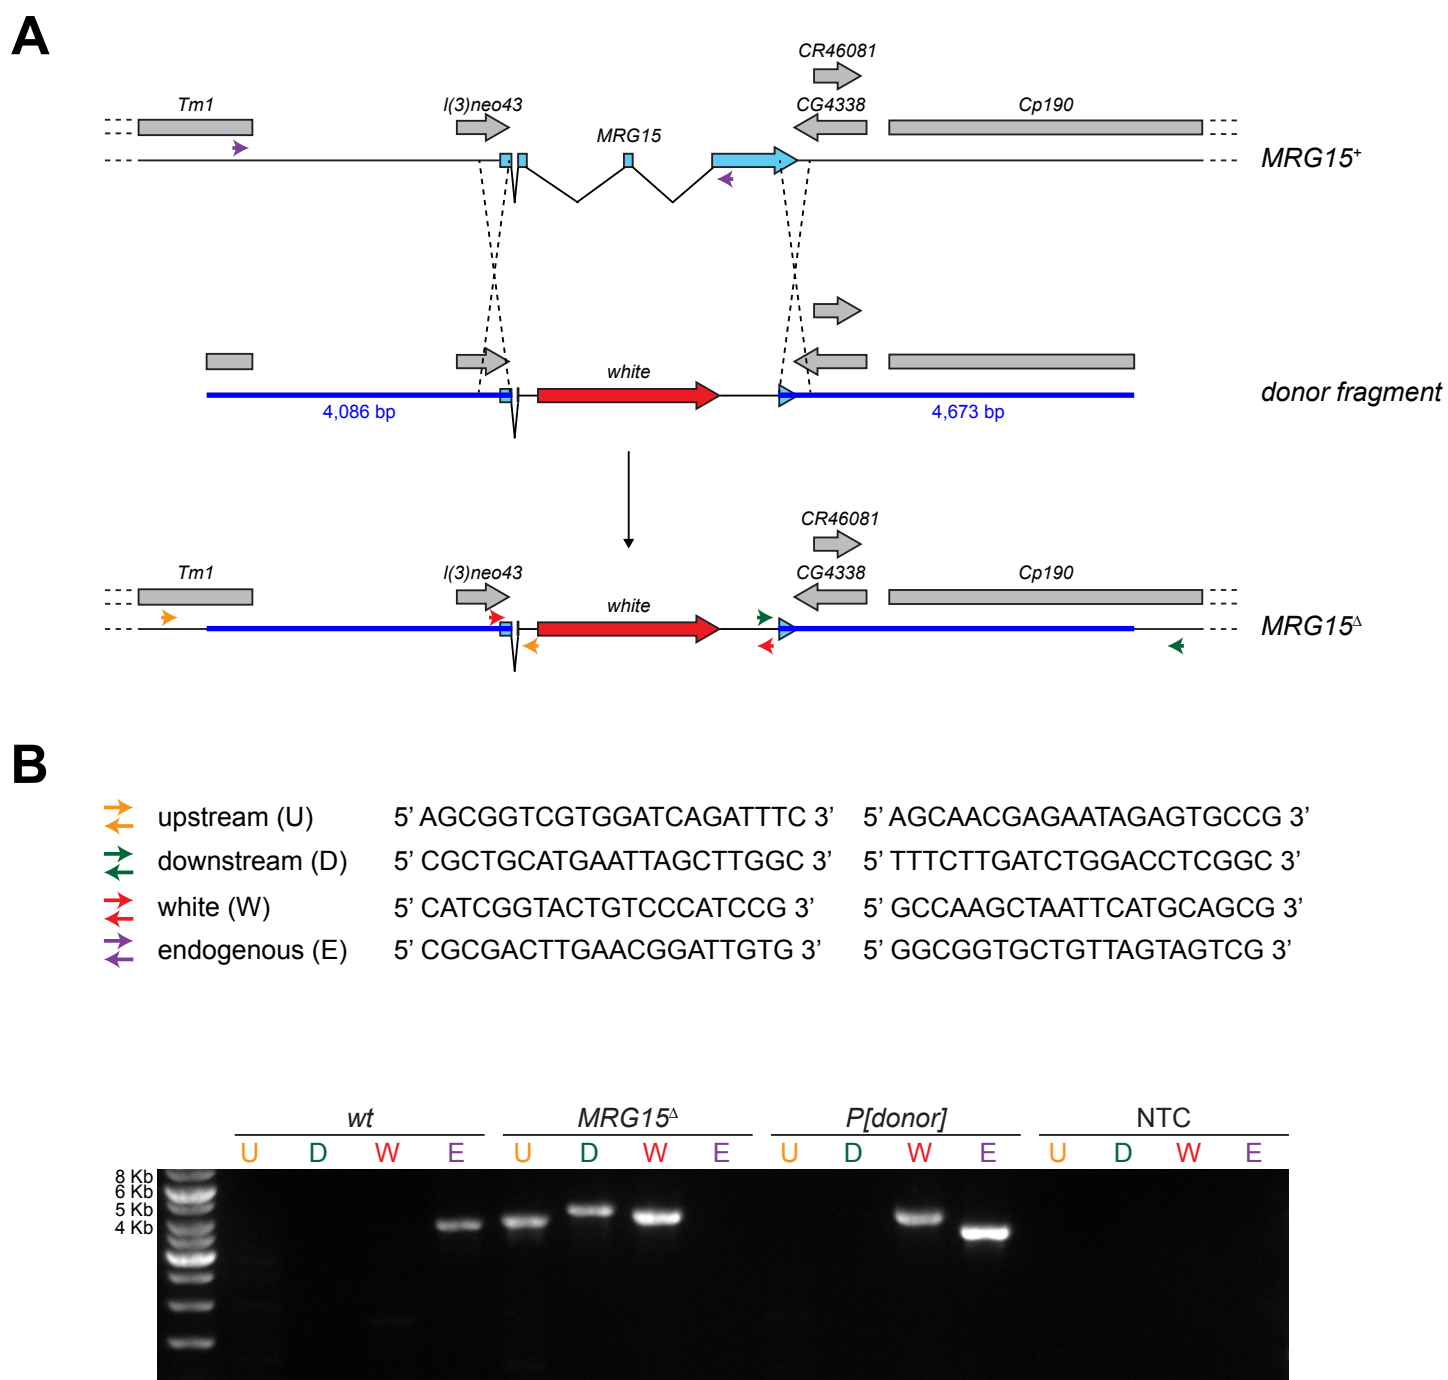**Figure S2**

Generation of the *MRG15<sup>Δ</sup>* deletion allele.

(A) Diagram of the strategy used to generate *MRG15<sup>Δ</sup>*.

Top: Schematic representation of the *MRG15* genomic region in *wildtype*. Middle: Donor fragment in the P-element vector with genomic fragments (blue) comprising the homology arms flanking the miniwhite cassette used to replace the *MRG15* gene. Bottom: *MRG15<sup>Δ</sup>*, the deletion allele obtained after ends-out gene replacement by homologous recombination.

(B) Polymerase Chain Reaction (PCR)-based characterization of the *MRG15<sup>Δ</sup>* allele. Shown are amplification reactions on genomic DNA from *wt*, *MRG15<sup>Δ</sup>* homozygotes, the *P[donor]* strain harboring the construct with the donor fragment, and a non-template control (NTC) with indicated primer pairs U, D, W and E; location of these amplicons is shown in (A).

**Table S1**

**Complete list of iBAQ values of proteins identified by mass spectrometry in the NTAP-Ash1 and Ash1-CTAP purifications shown in Fig. 1B**

[Click here to Download Table S1](#)

**Table S2****Ash1, Mrg15 and Caf1 peptide sequences from mass spectrometry analysis in Fig. 1B**

|                                | Ash-CTAP<br>(in solution<br>digest) | Ash1-CTAP<br>(in gel<br>digest) | NTAP-Ash1<br>(in gel<br>digest) |
|--------------------------------|-------------------------------------|---------------------------------|---------------------------------|
| <b>Ash1</b>                    |                                     |                                 |                                 |
| ADIDADNYQCER                   |                                     | +                               |                                 |
| AIQSIKDSYEQQK                  | +                                   |                                 | +                               |
| AKEETIVQTAVPR                  | +                                   | +                               | +                               |
| AEVESPIISAIDIKEDTK             | +                                   |                                 | +                               |
| AIEEGEEITYDYNFSIFNPSEGQPCR     | +                                   |                                 |                                 |
| EQAEAAPQPPPKESEIRPAK           | +                                   |                                 | +                               |
| CICGIYK                        |                                     | +                               |                                 |
| CICGIYKDEGIMIQCSK              |                                     | +                               |                                 |
| CIDAQTAQEQPIDISYIISGR          |                                     | +                               |                                 |
| CMVWQHTECTK                    |                                     | +                               |                                 |
| DEGIMIQCSK                     |                                     | +                               |                                 |
| DICSAMETIK                     |                                     | +                               |                                 |
| DIPIKDESGK                     |                                     | +                               | +                               |
| DISSAVAVAK                     |                                     | +                               |                                 |
| DKNIPQYQSTIIQDFMEK             |                                     | +                               |                                 |
| DSPIVPIKVTPPPPIEASPDEDVIR      |                                     | +                               | +                               |
| EEIQIDPIWR                     |                                     | +                               | +                               |
| EETIVQTAVPR                    |                                     | +                               |                                 |
| EIDVNKKFR                      |                                     |                                 | +                               |
| EIPIEEFTEEGHR                  |                                     | +                               |                                 |
| EKPVQPVTVVEIPPEIPVSQEEIDAEAEAK |                                     | +                               | +                               |
| EQAEAAPQPPP                    |                                     | +                               | +                               |
| ERDSPIVPIK                     |                                     | +                               | +                               |
| EVDREIPIEEFTEEGHR              |                                     | +                               | +                               |
| EVISSEEEPGK                    | +                                   | +                               | +                               |
| EVISSEEEPGKIAVK                | +                                   |                                 | +                               |
| FMTADKGWGV                     | +                                   |                                 | +                               |
| FVNHSCEPNCEMQK                 | +                                   | +                               |                                 |
| FYPNEVVR                       | +                                   | +                               |                                 |
| GGISATNPDNFISK                 | +                                   | +                               | +                               |
| GISAPADATAVHVVTPVAPNK          | +                                   | +                               | +                               |
| GITQAVHDPEIEKMAK               | +                                   | +                               | +                               |
| GRPMECNDEDHCYICEIR             | +                                   | +                               |                                 |
| GTYIIIEYVGEVVTEKEFK            | +                                   | +                               | +                               |
| GVIGGKSQR                      |                                     |                                 | +                               |
| HAVAPGVER                      |                                     |                                 | +                               |
| HIIEQPTSVSGAGSSASNSPIR         | +                                   | +                               |                                 |
| HYIITPGERPPAEVAFANGK           | +                                   | +                               | +                               |

|                                          |   |   |   |
|------------------------------------------|---|---|---|
| IASYVQIVEIIGDSESIQSFKPK                  |   | + | + |
| IDMAYIDKR                                | + |   | + |
| IGSTAATSKVEFR                            | + |   | + |
| IDSIPTEHDPIPASESHNPGPQDYASCSESSEDK       |   | + |   |
| IENVITMK                                 |   | + | + |
| IIDISPSSICSIK                            |   | + |   |
| ITEIEIITSTFNRSR                          |   | + | + |
| INAEAWAAAAAAK                            |   | + | + |
| INESVITK                                 |   | + | + |
| INRTGFPTVR                               |   |   | + |
| IPDGIDPNTNFSCK                           |   | + |   |
| IQDDRITGSSGK                             |   |   | + |
| IQATIAAPSPAQQITINGGGPASTISK              |   | + |   |
| IQPISEKEK                                |   |   | + |
| IQRPQTPAR                                |   |   | + |
| ISAIRPTIGVVATK                           |   |   | + |
| ISVVAIER                                 |   | + | + |
| IVVDNNSISGGK                             | + | + | + |
| KQKTEIDVGAGPTTMHK                        | + |   |   |
| KVSVEQQTAVIDEHEPEFDPDDEPIQSIRETR         | + |   |   |
| KVVPTVPAPGNISGPAINESADSGVISTTSTTQSTTPSPK | + |   |   |
| IASSSGISK                                |   |   | + |
| MQNENAVPTGSIPIASSSKPK                    | + | + | + |
| MSDIITTVSSKK                             | + | + | + |
| MVIFAK                                   |   | + | + |
| MVYTECSPSNCPAGEK                         | + | + |   |
| NAHKNPAETDSITDQSSQSK                     | + | + | + |
| NIEAGTQPK                                |   |   | + |
| NIPQYQSTIIQDFMEK                         |   | + | + |
| NPAETDSITDQSSQSK                         |   | + | + |
| NREQAEAAPQPPPK                           |   | + |   |
| NVVPWNRYR                                |   | + | + |
| QAGKDISSAVAVAK                           |   | + | + |
| QFNTFIVR                                 |   | + |   |
| QGDAVYVIR                                | + | + | + |
| QKTEIDVGAGPTTMHK                         |   | + |   |
| QPVIEPPPTPPPQKQK                         |   | + | + |
| QSIMPPPAK                                |   | + | + |
| RVESDTEDTTVEGSFRK                        |   | + |   |
| RFYPNEVVR                                |   | + | + |
| RIDSIPTEHDPIPASESHNPGPQDYASCSESSEDK      |   | + |   |
| RPSTPSSPSIAAQISAICSPR                    |   | + |   |
| RTEMDFEIPYDIWWAYTNSK                     |   | + |   |
| RVESDTEDTTVEGSFR                         |   | + |   |
| SATQFSVQR                                | + | + | + |
| SDTDGIRMR                                |   |   | + |

|                                       |   |   |   |
|---------------------------------------|---|---|---|
| SGYVSDYGSVR                           |   |   | + |
| SINIDSK                               |   |   | + |
| SIQAQVEQGHYKTPQEFDDHMQQIFVEAK         |   | + | + |
| SIKSATQFSVQR                          |   |   | + |
| SIKSATQFSVQRSDDTDGIR                  |   |   | + |
| SMSVGAASGTGASTTICK                    | + | + |   |
| SIPTTSASK                             |   |   | + |
| SQAQFNAR                              |   |   | + |
| SQSNDS SSPDDHKIPIK(                   |   |   | + |
| SRIENVITMK                            | + |   | + |
| SSAAMCSSYVSGVSR                       |   | + |   |
| SSADDTVEDQDIIQIAGISIGQSSEESNEYISKPSIK |   | + | + |
| SSNNVNVQAAPNPPIDCERVPQAGEAR           | + | + |   |
| STASTKSQAQFNAR                        |   |   | + |
| SYAPHDVDPSTIK                         | + | + | + |
| TEIDVGAGPTTMHK                        | + | + | + |
| TEMDFEIPYDIWWAYTNSK                   |   | + |   |
| TGGNIIK                               |   |   | + |
| TNVYAESVRPNIAFGDHTCNCK                |   | + |   |
| TPQEFDDHMQQIFVEAK                     |   | + | + |
| TQMIGQTVNAK                           |   | + | + |
| TYIVAGIFSNHYK                         | + | + |   |
| VESDTEDTTVEGSFR                       |   |   | + |
| VIAAKSGYVSDYGSVR                      |   |   | + |
| VIYPPPR                               |   |   | + |
| VKPTYIVAGIFSNHYK                      |   | + |   |
| VKPIPAVEAKPSGEGISGR                   |   | + | + |
| VPQAGEARETFVAR                        |   |   | + |
| VSIYEVVPIEIVIGR                       | + | + | + |
| VSVEQQTAVIDEHEPEFDPDDEPIQSIR          | + | + | + |
| VVETIIHK                              | + | + | + |
| WSVNGISR                              |   | + | + |
| YVTTGQYFGR                            |   | + | + |
| YYISIMR                               |   | + | + |
| <b>MRG15</b>                          |   |   |   |
| AIPQVAIDINFSKGDR                      | + | + |   |
| ASTPSKDSNTSQSTASSTPTTSAGPGSK          | + |   | + |
| DSNTSQSTASSTPTTSAGPGSK                |   | + |   |
| FAIGGGEVIK                            |   | + |   |
| EDPAAAETTEEEGPVAPK                    |   | + |   |
| GEVKPAKVENYSTGTDANTIFVDGER            | + |   |   |
| GWDVGVAGMK                            |   | + |   |
| HPDTPISEIYGSFHIIIR                    |   | + |   |
| HYITDDWYAVVR                          |   | + |   |
| IGPNSTIVFEVEIK                        |   | + |   |

|                                                |   |   |   |
|------------------------------------------------|---|---|---|
| IIEIPAK                                        | + | + | + |
| IKIPDEIKHYITDDWYAVVR                           | + | + |   |
| IQSNNKTFDSIIK                                  | + |   |   |
| IVDQVVGK                                       |   | + |   |
| IVDQVVGKGEEAK                                  | + |   |   |
| MSEQRPSITGSDVAEKPIPPPTTTPSTPTTEPAPCVESEEEAYAAK |   | + |   |
| NSSIFFSMSNFINDPEYVR                            |   | + | + |
| NWDEWVPENR                                     |   | + | + |
| QEYIVATVTK                                     |   | + |   |
| SEAGSTGTTTTNSTANSTTSR                          | + | + | + |
| SFHISGVAIDKGQEAQ                               | + | + |   |
| SMFWGINMKPER                                   |   | + |   |
| TKPDATPVEYYIHYAGWSK                            | + | + | + |
| TQYADVMQK                                      | + | + | + |
| VENYSTGTDANTIFVDGER                            |   | + | + |
| VICFHGPIIYEAK                                  | + | + |   |
| VITCPPHMAYGAR                                  |   | + |   |
| VSVYYIGR                                       | + |   |   |
| VTVQQISEQYIAHK                                 |   | + | + |
| YSQTIK                                         |   | + |   |
| <b>Caf1</b>                                    |   |   |   |
| APAVGIDIGTTYSCVGVFQHGK                         |   | + |   |
| ARFEEINADIFR                                   |   | + |   |
| ATIDEDNIK                                      | + | + |   |
| EIEGVCNPIITK                                   |   | + |   |
| ETAAYIGK                                       |   | + |   |
| FDDAAVQSDMK                                    |   | + |   |
| FEEINADIFR                                     |   | + |   |
| FEISGIPPAPR                                    |   | + |   |
| GEFGGFGSVCGK                                   |   | + |   |
| HPSKPEPSGECQPDIR                               |   | + |   |
| HWPFEVVSADGKPK                                 |   | + |   |
| IEIEIK                                         |   | + |   |
| IEVTYKDEK                                      |   | + | + |
| IGEEQSTEDAEDGPPEIIFIHGGHTAK                    | + | + | + |
| IHSFESHKDEIFVQWSPHNETIIASSGTDR                 |   | + |   |
| IHVWDISK                                       |   | + | + |
| IIIGTHTSDEQNHIIASVQIPSEDAQFDGSHYDNEK           |   | + |   |
| IINEPTAAAIAYGIDK                               | + | + |   |
| IIQDIFNGK                                      |   | + |   |
| IMIWDTR                                        |   | + |   |
| IVTHFVQEFK                                     |   | + |   |
| KFDDAAVQSDMK                                   |   | + |   |
| MKETAEAYIGK                                    | + | + |   |
| NGIESYCFNMK                                    |   | + |   |

|                                 |   |   |   |
|---------------------------------|---|---|---|
| NIFTGHTAVVEDVAWHIIHESIFGSVADDQK |   | + |   |
| NQVAMNPTQTIFDAK                 | + | + |   |
| PSHTVDAHTAEVNCISFNPYSEFIATGSADK |   | + |   |
| QKEIEGVCNPIITK                  |   | + |   |
| QTQTFTTYSNQPVGVIQVYEGER         |   | + |   |
| RIHVWDISK                       |   | + |   |
| SDNAAESFDDAVEER                 |   | + | + |
| SINPDEAVAYGAAVQAAIIHGDK         |   | + |   |
| STAGDTHIGGEDFDNR                |   | + |   |
| SVIHDIVIVGGSTR                  |   | + |   |
| TFFPEEISSMVITK                  |   | + |   |
| TPSSDVIVFDYTK                   |   | + |   |
| TTPSYVAFTDTER                   | + | + |   |
| TVAIWDIR                        |   | + | + |
| TVTNAVITVPAYFNDSQR              | + | + |   |
| VDRSDNAAESFDDAVEER              | + |   |   |
| VEIIANDQGNR                     |   | + |   |
| VINEEYKIWK                      |   |   | + |
| WIDANQIADKEEYEHR                |   | + |   |
| YMPQNACVIATK                    |   | + |   |

**Table S3**

**Differential expression of genes in T3 and T2 imaginal discs from *ash1*<sup>22</sup> homozygous mutants compared to *wildtype***

[Click here to Download Table S3](#)



## Table S4

### Antibodies

| Specificity | Source/Reference                              |
|-------------|-----------------------------------------------|
| H3K36me2    | Cell Signaling (C75H12)                       |
| H3K36me2    | Abcam (ab9049)                                |
| H3K36me3    | Cell Signaling (D5A7)                         |
| H4          | Abcam (ab10158)                               |
| Abd-B       | Developmental Studies Hybridoma Bank (1A2E9)  |
| Ubx         | Developmental Studies Hybridoma Bank (FP3.38) |
| Caf1        | Gambetta et al, 2009                          |
| Ash1        | this study                                    |

Reference : Gambetta, M.C., Oktaba, K., Müller, J. 2009. Essential role of the glycosyltransferase Sxc/Ogt in Polycomb repression. *Science* **325**: 93-96.

**Table S5: Primers used for ChIP qPCR analysis**

| <b>Gene</b>   | <b>Position</b> | <b>Forward primer (5' to 3')</b> | <b>Reverse primer (5' to 3')</b> |
|---------------|-----------------|----------------------------------|----------------------------------|
| <i>Ubx</i>    | +76.9 kb        | GCTCGTTGGATCCACTAAACT            | TGAGCCGTTAATTGATCGTGAG           |
|               | +75.5 kb        | TTCGTTTCAGCTCCTTGATCG            | ACAGACATACACCCGCTACC             |
|               | +34.4 kb        | GTCCTGGCCAAGGCAAATATT            | CGAAAGGAGAACGGAGAATGG            |
|               | +0.8 kb         | AATTGGTTTCCAGGGATCTGC            | ATCCAAAGGAGGCAAAGGAAC            |
|               | 0               | TCCAATCCGTTGCCATCGAACGAAT        | TTAGGCCGAGTCGAGTGAGTTGAGT        |
| <i>mth</i>    | +2.1 kb         | AGACTGATGACGGAAAGCCA             | GTCGACGATACGGTGAAGAAC            |
|               | +1.6 kb         | CGAAGAGTCACACGGTCAAAG            | CTAGACAACCGCGAAGAACAG            |
| <i>CG6310</i> | +0.5 kb         | GAGGGCATTTCATATCACTTCCG          | ACCAAGTCATTACCCGGAGTAT           |
|               | +0.1 kb         | TTTTCCGGTTGACTCTGCTTG            | CCTGCTCCTCTATGTCTTCGT            |
| <i>wg</i>     | +7.3 kb         | GTCCGGATCGTGTACAGTGA             | GCTGCATTCGGACTAACTGG             |
| <i>tsh</i>    | +6.8 kb         | TGCCTCGTCTGTTTAAAGTGC            | TTGGTGGATGAGTTGGATGGA            |
| <i>Lam</i>    | +1.3 kb         | AGTGCGTGGAAACTGAATCG             | ACCACGCCTTTTGTCTCTTC             |
| <i>dpr12</i>  | +6.2 kb         | TCAAGCCGAACCCTCTAAAAT            | AACGCCAACAAACAGAAAATG            |
|               | +39.1 kb        | CCGAACATGAGAGATGGAAAA            | AAAGTGCCGACAATGCAGTTA            |

Positions of the middle nucleotides in the amplified regions are given relative to the corresponding gene transcription start site.
